# Supplementary material for: Delayed Administration of Angiotensin Receptor (AT2R) Agonist C21 Improves Survival and Preserves Sensorimotor Outcomes in Female Diabetic Rats Post-Stroke through Modulation of Microglial Activation
Source: MDPI journal article supplement (doi:10.3390/ijms22031356), 2021-01-29
Supplement: s1 [file s1]

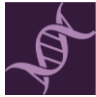

## Supplementary Materials

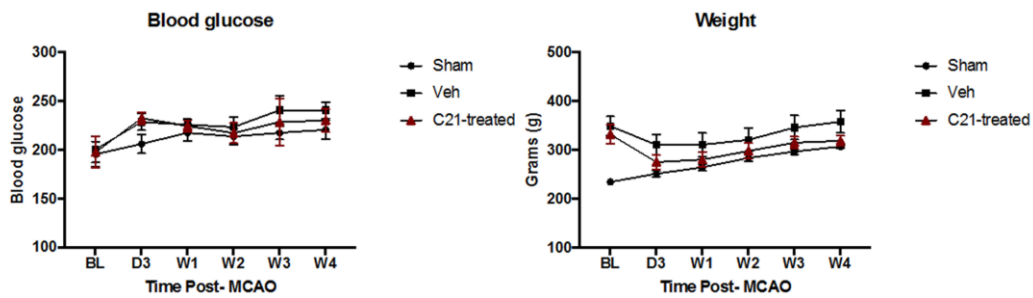

**Figure S1.** Delayed C21 administration did not impact blood glucose levels or weight gain. Weight loss after stroke was also similar in vehicle and C-21 treated groups suggesting that stroke severity was comparable between the groups.

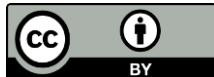

© 2021 by the authors. Submitted for possible open access publication under the terms and conditions of the Creative Commons Attribution (CC BY) license (<http://creativecommons.org/licenses/by/4.0/>).
